# Supplementary material
Source: HighWire-hosted journal article supplement (http://gut.bmjjournals.com/highwire/filestream/193068/field_highwire_adjunct_files/0/Survey_coeliac_definitions.pdf)
Supplement: Survey_coeliac_definitions.pdf [file Survey_coeliac_definitions.pdf]

1a. GLUTEN ATAXIA: "*Idiopathic sporadic ataxia and positive serum antigliadin antibodies even in the absence of an enteropathy on duodenal biopsy*".  
 AGREE/NOT AGREE? Please motivate (explanatory motives/texts are welcome!).

|            |                         |                                                                                                                                                                                                                 |
|------------|-------------------------|-----------------------------------------------------------------------------------------------------------------------------------------------------------------------------------------------------------------|
| 06/01/2011 | <a href="#">5184241</a> | agree                                                                                                                                                                                                           |
| 06/01/2011 | <a href="#">5184342</a> | In general, I agree with the definition. My concern is related to the necessity of evidences of clinical improvement with a GFD or presence of gluten-related autoimmunity (TTG6 antibodies or other features). |
| 06/02/2011 | <a href="#">5187394</a> | agree                                                                                                                                                                                                           |
| 06/02/2011 | <a href="#">5187902</a> | partially agree: should there be some criteria for stabilization or improvement on a GFD. Lots of people have anti gliadin serologies, is that really enough?                                                   |
| 06/02/2011 | <a href="#">5188116</a> | Agree                                                                                                                                                                                                           |
| 06/03/2011 | <a href="#">5190026</a> | Agree                                                                                                                                                                                                           |
| 06/03/2011 | <a href="#">5191909</a> |                                                                                                                                                                                                                 |
| 06/04/2011 | <a href="#">5192888</a> | not agree. In general gluten ataxia is associated to positive TTG6 and, therefore positive serum antigliadin antibodies is reductive                                                                            |

|            |                         |                                                                                                                                                                                                                                                                                                                                                     |
|------------|-------------------------|-----------------------------------------------------------------------------------------------------------------------------------------------------------------------------------------------------------------------------------------------------------------------------------------------------------------------------------------------------|
| 06/06/2011 | <a href="#">5194764</a> | Agree                                                                                                                                                                                                                                                                                                                                               |
| 06/06/2011 | <a href="#">5196265</a> | I agree                                                                                                                                                                                                                                                                                                                                             |
| 06/06/2011 | <a href="#">5196255</a> | agree<br><br>Bushara KO.Neurologic presentation of celiac disease.Gastroenterology. 2005 Apr;128(4 Suppl 1):S92-7.PMID: 15825133                                                                                                                                                                                                                    |
| 06/06/2011 | <a href="#">5196667</a> | agree however the defintion does not imply that the gluten is casuative to the ataxia it could be that the cerebellar immune response may cause false postiive AGA<br>Serology of celiac disease in gluten-sensitive ataxia or neuropathy: role of deamidated gliadin antibody. Journal of Neuroimmunology. 2011 Jan; 230(1-2): 130-4 PMID 21056914 |
| 06/07/2011 | <a href="#">5197653</a> | agree<br>body of literature from Hadjivassiliou and now others supporting this                                                                                                                                                                                                                                                                      |
| 06/07/2011 | <a href="#">5197740</a> | agree, we have to wait and see if anti-TG6 proves to be a more specofoc marker                                                                                                                                                                                                                                                                      |
| 06/07/2011 | <a href="#">5198378</a> | Agree. This is the way it has been defined. I am not sure if this is biologically correct. My feeling is that gluten ataxia without pos IgA-TTG and/or biopsy findings is something else that overt CD with ataxia.                                                                                                                                 |
| 06/19/2011 | <a href="#">5244454</a> | Agree                                                                                                                                                                                                                                                                                                                                               |

**1b. GLUTEN ATAXIA: If you disagree with the definition above, please a) suggest an alternative definition; b) please list the references that support your stance, and if possible add their PMID-number.**

|            |                         |                                                                                                                                    |
|------------|-------------------------|------------------------------------------------------------------------------------------------------------------------------------|
| 06/01/2011 | <a href="#">5184241</a> |                                                                                                                                    |
| 06/01/2011 | <a href="#">5184342</a> |                                                                                                                                    |
| 06/02/2011 | <a href="#">5187394</a> |                                                                                                                                    |
| 06/02/2011 | <a href="#">5187902</a> |                                                                                                                                    |
| 06/02/2011 | <a href="#">5188116</a> |                                                                                                                                    |
| 06/03/2011 | <a href="#">5190026</a> |                                                                                                                                    |
| 06/03/2011 | <a href="#">5191909</a> |                                                                                                                                    |
| 06/04/2011 | <a href="#">5192888</a> | Idiopathic sporadic ataxia secondary to an immune-mediated response to gliadin and positive TTG6 and seruma antigliadin antibodies |
| 06/06/2011 | <a href="#">5194764</a> |                                                                                                                                    |
| 06/06/2011 | <a href="#">5196265</a> |                                                                                                                                    |
| 06/06/2011 | <a href="#">5196255</a> |                                                                                                                                    |
| 06/06/2011 | <a href="#">5196667</a> |                                                                                                                                    |
| 06/07/2011 | <a href="#">5197653</a> |                                                                                                                                    |
| 06/07/2011 | <a href="#">5197740</a> |                                                                                                                                    |
| 06/07/2011 | <a href="#">5198378</a> |                                                                                                                                    |
| 06/19/2011 | <a href="#">5244454</a> |                                                                                                                                    |

**2a. ASYMPTOMATIC CD: "a gluten-induced enteropathy not accompanied by symptoms even in response to direct questioning. These patients are diagnosed by screening in subjects apparently healthy, in population enrolled in screening programs or in case-finding strategies for detecting CD among patients with disorders having high-risk for CD. Many**

*of these asymptomatic/silent cases are affected by a low-grade intensity illness or decreased quality of life. Often minor symptoms (eg, fatigue) are only realized after introduction of a gluten free diet."* AGREE/NOT AGREE? Please motivate (explanatory motives/texts are welcome!).

|            |                         |                                                                                                                                                                                                                                                                                                                                                                                                                                                                                                                                                                                                                                                                                                                                                                                      |
|------------|-------------------------|--------------------------------------------------------------------------------------------------------------------------------------------------------------------------------------------------------------------------------------------------------------------------------------------------------------------------------------------------------------------------------------------------------------------------------------------------------------------------------------------------------------------------------------------------------------------------------------------------------------------------------------------------------------------------------------------------------------------------------------------------------------------------------------|
| 06/01/2011 | <a href="#">5184241</a> | agree                                                                                                                                                                                                                                                                                                                                                                                                                                                                                                                                                                                                                                                                                                                                                                                |
| 06/01/2011 | <a href="#">5184342</a> | I completely agree by obvious reasons                                                                                                                                                                                                                                                                                                                                                                                                                                                                                                                                                                                                                                                                                                                                                |
| 06/02/2011 | <a href="#">5187394</a> | agree but please add a sentence that clarify the screening tests are atTG and EMA are always (quite always) positive in absence of IgA deficiency. in Italy someone screens with HLA and generates confusion                                                                                                                                                                                                                                                                                                                                                                                                                                                                                                                                                                         |
| 06/02/2011 | <a href="#">5187902</a> | agree                                                                                                                                                                                                                                                                                                                                                                                                                                                                                                                                                                                                                                                                                                                                                                                |
| 06/02/2011 | <a href="#">5188116</a> | Not agree: Awkward syntax and unnecessarily long and cumbersome: "a gluten-induced enteropathy not accompanied by symptoms [delete as not necessary: "even in response to direct questioning"]. These individuals [not patients as symptomless] are diagnosed by screening [delete the remainder as being a discussion/commentary that is not needed within the definition: "in subjects apparently healthy, in population enrolled in screening programs or in case-finding strategies for detecting CD among patients with disorders having high-risk for CD. Many of these asymptomatic/silent cases are affected by a low-grade intensity illness or decreased quality of life. Often minor symptoms (eg, fatigue) are only realized after introduction of a gluten free diet."] |
| 06/03/2011 | <a href="#">5190026</a> | I agree 90%                                                                                                                                                                                                                                                                                                                                                                                                                                                                                                                                                                                                                                                                                                                                                                          |
| 06/03/2011 | <a href="#">5191909</a> |                                                                                                                                                                                                                                                                                                                                                                                                                                                                                                                                                                                                                                                                                                                                                                                      |
| 06/04/2011 | <a href="#">5192888</a> | agree                                                                                                                                                                                                                                                                                                                                                                                                                                                                                                                                                                                                                                                                                                                                                                                |
| 06/06/2011 | <a href="#">5194764</a> | agree                                                                                                                                                                                                                                                                                                                                                                                                                                                                                                                                                                                                                                                                                                                                                                                |
| 06/06/2011 | <a href="#">5196265</a> | I agree. It is a synonym of silent celiac disease                                                                                                                                                                                                                                                                                                                                                                                                                                                                                                                                                                                                                                                                                                                                    |
| 06/06/2011 | <a href="#">5196255</a> | agree                                                                                                                                                                                                                                                                                                                                                                                                                                                                                                                                                                                                                                                                                                                                                                                |
| 06/06/2011 | <a href="#">5196667</a> | agree                                                                                                                                                                                                                                                                                                                                                                                                                                                                                                                                                                                                                                                                                                                                                                                |
| 06/07/2011 | <a href="#">5197653</a> | not agree<br>surely anyone with minor symptoms cannot be labelled as asymptomatic?<br>silent or asymptomatic may be interchangeable but they to my mind represent those individuals who really have nothing wrong with them from the patients perspective. They may come from screening but often screening individuals then describe subtle symptoms                                                                                                                                                                                                                                                                                                                                                                                                                                |
| 06/07/2011 | <a href="#">5197740</a> | agree                                                                                                                                                                                                                                                                                                                                                                                                                                                                                                                                                                                                                                                                                                                                                                                |
| 06/07/2011 | <a href="#">5198378</a> | Agree. But many of the patients that are found by screening can have active disease (unrecognized CD).                                                                                                                                                                                                                                                                                                                                                                                                                                                                                                                                                                                                                                                                               |
| 06/19/2011 | <a href="#">5244454</a> | Agree                                                                                                                                                                                                                                                                                                                                                                                                                                                                                                                                                                                                                                                                                                                                                                                |

**2b. ASYMPTOMATIC CD:** If you disagree with the definition above, please a) suggest an alternative definition; b) please list the references that support your stance, and if possible add their PMID-number.

|            |                         |                                                                                                                                                                                                                                                |
|------------|-------------------------|------------------------------------------------------------------------------------------------------------------------------------------------------------------------------------------------------------------------------------------------|
| 06/01/2011 | <a href="#">5184241</a> |                                                                                                                                                                                                                                                |
| 06/01/2011 | <a href="#">5184342</a> |                                                                                                                                                                                                                                                |
| 06/02/2011 | <a href="#">5187394</a> |                                                                                                                                                                                                                                                |
| 06/02/2011 | <a href="#">5187902</a> |                                                                                                                                                                                                                                                |
| 06/02/2011 | <a href="#">5188116</a> | "a gluten-induced enteropathy not accompanied by symptoms and detected by screening"                                                                                                                                                           |
| 06/03/2011 | <a href="#">5190026</a> | I would not include in this group patients found to be affected by CD because of associated pathological conditions (i.e. IDDM, thyroid diseases, etc etc). In my opinion these patients should be considered to be affected by subclinical CD |
| 06/03/2011 | <a href="#">5191909</a> |                                                                                                                                                                                                                                                |
| 06/04/2011 | <a href="#">5192888</a> |                                                                                                                                                                                                                                                |

|            |                         |                                                                                                                                                                                                                 |
|------------|-------------------------|-----------------------------------------------------------------------------------------------------------------------------------------------------------------------------------------------------------------|
| 06/06/2011 | <a href="#">5194764</a> |                                                                                                                                                                                                                 |
| 06/06/2011 | <a href="#">5196265</a> |                                                                                                                                                                                                                 |
| 06/06/2011 | <a href="#">5196255</a> |                                                                                                                                                                                                                 |
| 06/06/2011 | <a href="#">5196667</a> |                                                                                                                                                                                                                 |
| 06/07/2011 | <a href="#">5197653</a> | see above<br>happy to use term to describe that group but then like to call the other coeliac typical and atypical. typical any GI symptoms or anaemia atypical - the rest of the symptoms no matter how subtle |
| 06/07/2011 | <a href="#">5197740</a> |                                                                                                                                                                                                                 |
| 06/07/2011 | <a href="#">5198378</a> |                                                                                                                                                                                                                 |
| 06/19/2011 | <a href="#">5244454</a> |                                                                                                                                                                                                                 |

**3a. SUBCLINICAL CD: "Celiac disease that stays below the surface of clinical detection and, therefore, might have no recognizable clinical findings."**

**AGREE/NOT AGREE? Please motivate (explanatory motives/texts are welcome!).**

|            |                         |                                                                                                                                                                                                          |
|------------|-------------------------|----------------------------------------------------------------------------------------------------------------------------------------------------------------------------------------------------------|
| 06/01/2011 | <a href="#">5184241</a> | agree<br>this is different to 2a, or the same<br>would not include this as a definition because it is redundant                                                                                          |
| 06/01/2011 | <a href="#">5184342</a> | I agree                                                                                                                                                                                                  |
| 06/02/2011 | <a href="#">5187394</a> | in the presence of positive serology and histology                                                                                                                                                       |
| 06/02/2011 | <a href="#">5187902</a> | how is this different from asymptomatic as defined above?                                                                                                                                                |
| 06/02/2011 | <a href="#">5188116</a> | Agree but does this differ in any way from asymptomatic CD? If yes the difference is not within the definitions. If they are the same then they can be combined for simplicity into the same definition. |
| 06/03/2011 | <a href="#">5190026</a> | I do not agree                                                                                                                                                                                           |
| 06/03/2011 | <a href="#">5191909</a> |                                                                                                                                                                                                          |
| 06/04/2011 | <a href="#">5192888</a> |                                                                                                                                                                                                          |
| 06/06/2011 | <a href="#">5194764</a> | agree                                                                                                                                                                                                    |
| 06/06/2011 | <a href="#">5196265</a> | I agree                                                                                                                                                                                                  |
| 06/06/2011 | <a href="#">5196255</a> | agree                                                                                                                                                                                                    |
| 06/06/2011 | <a href="#">5196667</a> | agree                                                                                                                                                                                                    |
| 06/07/2011 | <a href="#">5197653</a> | agree                                                                                                                                                                                                    |
| 06/07/2011 | <a href="#">5197740</a> | what is the difference from asymptomatic CD?                                                                                                                                                             |
| 06/07/2011 | <a href="#">5198378</a> | Agree with the text, but I do not use the term. The present level of clinical finding may change in any individual.                                                                                      |
| 06/19/2011 | <a href="#">5244454</a> | Agree                                                                                                                                                                                                    |

**3b. SUBCLINICAL CD: If you disagree with the definition above, please a) suggest an alternative definition; b) list the references that support your stance, and if possible add their PMID-number.**

|            |                         |           |
|------------|-------------------------|-----------|
| 06/01/2011 | <a href="#">5184241</a> | see above |
| 06/01/2011 | <a href="#">5184342</a> |           |
| 06/02/2011 | <a href="#">5187394</a> |           |
| 06/02/2011 | <a href="#">5187902</a> |           |
| 06/02/2011 | <a href="#">5188116</a> |           |

|            |                         |                                                                                                                                                                                                                                                                     |
|------------|-------------------------|---------------------------------------------------------------------------------------------------------------------------------------------------------------------------------------------------------------------------------------------------------------------|
| 06/03/2011 | <a href="#">5190026</a> | The definition is too vague. I would include in this definition patients found to be affected by CD because of symptoms suggestive of selective malabsorption (for example iron deficiency anaemia, osteoporosis, etc etc) or associated conditions (IDDM, etc etc) |
| 06/03/2011 | <a href="#">5191909</a> |                                                                                                                                                                                                                                                                     |
| 06/04/2011 | <a href="#">5192888</a> |                                                                                                                                                                                                                                                                     |
| 06/06/2011 | <a href="#">5194764</a> |                                                                                                                                                                                                                                                                     |
| 06/06/2011 | <a href="#">5196265</a> |                                                                                                                                                                                                                                                                     |
| 06/06/2011 | <a href="#">5196255</a> |                                                                                                                                                                                                                                                                     |
| 06/06/2011 | <a href="#">5196667</a> |                                                                                                                                                                                                                                                                     |
| 06/07/2011 | <a href="#">5197653</a> |                                                                                                                                                                                                                                                                     |
| 06/07/2011 | <a href="#">5197740</a> |                                                                                                                                                                                                                                                                     |
| 06/07/2011 | <a href="#">5198378</a> |                                                                                                                                                                                                                                                                     |
| 06/19/2011 | <a href="#">5244454</a> |                                                                                                                                                                                                                                                                     |

**4a. CLASSICAL=TYPICAL CD: "a gluten-induced enteropathy presenting with diarrhea, malnutrition or a malabsorption syndrome (indicated by weight loss, steatorrhea and edema secondary to hypoalbuminemia)". AGREE/NOT AGREE? Please motivate (explanatory motives/texts are welcome!).**

|            |                         |                                                                                                                                                                                                                                                                                                                                                                                                                                            |
|------------|-------------------------|--------------------------------------------------------------------------------------------------------------------------------------------------------------------------------------------------------------------------------------------------------------------------------------------------------------------------------------------------------------------------------------------------------------------------------------------|
| 06/01/2011 | <a href="#">5184241</a> | agree                                                                                                                                                                                                                                                                                                                                                                                                                                      |
| 06/01/2011 | <a href="#">5184342</a> | I agree                                                                                                                                                                                                                                                                                                                                                                                                                                    |
| 06/02/2011 | <a href="#">5187394</a> | agree                                                                                                                                                                                                                                                                                                                                                                                                                                      |
| 06/02/2011 | <a href="#">5187902</a> | mostly agree, what about someone with just abdominal pain and fatigue with or without anemia. thats pretty classic for celiac but wouldnt be captured in above                                                                                                                                                                                                                                                                             |
| 06/02/2011 | <a href="#">5188116</a> |                                                                                                                                                                                                                                                                                                                                                                                                                                            |
| 06/03/2011 | <a href="#">5190026</a> | I agree 90%                                                                                                                                                                                                                                                                                                                                                                                                                                |
| 06/03/2011 | <a href="#">5191909</a> |                                                                                                                                                                                                                                                                                                                                                                                                                                            |
| 06/04/2011 | <a href="#">5192888</a> | disagree. GI symptoms, even if frequent, cannot be considered typical anymore. The vast majority of CD sufferers, particularly adults, have "atypical" manifestations, like anemia, fatigue, abdominal pain, etc. in complete absence of malabsorption symptoms                                                                                                                                                                            |
| 06/06/2011 | <a href="#">5194764</a> | agree, but sumtoms may be subtle; onlu loose stools, flatulence problems ande.g isolated sideropenic anemia. If this is a strict definition, we do not have many typical celiac patients in Finland at all.                                                                                                                                                                                                                                |
| 06/06/2011 | <a href="#">5196265</a> | I agree                                                                                                                                                                                                                                                                                                                                                                                                                                    |
| 06/06/2011 | <a href="#">5196255</a> | agree but would lose the statement in brackest as too restrictive and define histology count of IELs as <25<br>Gastroenterology. 2010 Jul;139(1):112-9. Epub 2010 Apr 13.<br><br>Detection of celiac disease and lymphocytic enteropathy by parallel serology and histopathology in a population-based study.<br><br>Walker MM, Murray JA, Ronkainen J, Aro P, Storskrubb T, D'Amato M, Lahr B, Talley NJ, Agreus L.<br><br>PMID: 20398668 |
| 06/06/2011 | <a href="#">5196667</a> | agree                                                                                                                                                                                                                                                                                                                                                                                                                                      |
| 06/07/2011 | <a href="#">5197653</a> |                                                                                                                                                                                                                                                                                                                                                                                                                                            |
| 06/07/2011 | <a href="#">5197740</a> | agree                                                                                                                                                                                                                                                                                                                                                                                                                                      |
| 06/07/2011 | <a href="#">5198378</a> | Agree, but also this term is of limited value as it is more rarely seen these days.                                                                                                                                                                                                                                                                                                                                                        |
| 06/19/2011 | <a href="#">5244454</a> | Agree                                                                                                                                                                                                                                                                                                                                                                                                                                      |

**4b. CLASSICAL=TYPICAL CD: If you disagree with**

the definition above, please a) suggest an alternative definition; b) list the references that support your stance, and if possible add their PMID-number.

|            |                         |                                                                                                                                                                                                                            |
|------------|-------------------------|----------------------------------------------------------------------------------------------------------------------------------------------------------------------------------------------------------------------------|
| 06/01/2011 | <a href="#">5184241</a> |                                                                                                                                                                                                                            |
| 06/01/2011 | <a href="#">5184342</a> |                                                                                                                                                                                                                            |
| 06/02/2011 | <a href="#">5187394</a> |                                                                                                                                                                                                                            |
| 06/02/2011 | <a href="#">5187902</a> |                                                                                                                                                                                                                            |
| 06/02/2011 | <a href="#">5188116</a> | "a gluten-induced enteropathy presenting with signs and symptoms of marked malabsorption such as diarrhea, steatorrhea, abdominal bloating, nutritional deficiencies, weight loss and edema secondary to hypoalbuminemia." |
| 06/03/2011 | <a href="#">5190026</a> | I would write "a gluten-induced enteropathy presenting with diarrhea, malnutrition or a GLOBAL malabsorption syndrome (indicated by weight loss, steatorrhea OR edema secondary to hypoalbuminemia)."                      |
| 06/03/2011 | <a href="#">5191909</a> |                                                                                                                                                                                                                            |
| 06/04/2011 | <a href="#">5192888</a> | to be abandoned. The classification should be: 1. Symptomatic; 2. Asymptomatic; 3. Silent                                                                                                                                  |
| 06/06/2011 | <a href="#">5194764</a> | Abdominal symptoms or signs of malabsorption may be subtle.                                                                                                                                                                |
| 06/06/2011 | <a href="#">5196265</a> |                                                                                                                                                                                                                            |
| 06/06/2011 | <a href="#">5196255</a> |                                                                                                                                                                                                                            |
| 06/06/2011 | <a href="#">5196667</a> |                                                                                                                                                                                                                            |
| 06/07/2011 | <a href="#">5197653</a> | see answer 2b                                                                                                                                                                                                              |
| 06/07/2011 | <a href="#">5197740</a> |                                                                                                                                                                                                                            |
| 06/07/2011 | <a href="#">5198378</a> |                                                                                                                                                                                                                            |
| 06/19/2011 | <a href="#">5244454</a> |                                                                                                                                                                                                                            |

**4c. CLASSICAL=TYPICAL CD: PEDIATRIC SETTING.**  
*"in addition to the features listed in "4a" findings such as: failure to thrive, muscle wasting, poor appetite, change of mood and abdominal distension suggest a classical CD".* AGREE/NOT AGREE? Please motivate (explanatory motives/texts are welcome!).

|            |                         |                                                    |
|------------|-------------------------|----------------------------------------------------|
| 06/01/2011 | <a href="#">5184241</a> | agree                                              |
| 06/01/2011 | <a href="#">5184342</a> | I agree                                            |
| 06/02/2011 | <a href="#">5187394</a> | agree                                              |
| 06/02/2011 | <a href="#">5187902</a> | agree                                              |
| 06/02/2011 | <a href="#">5188116</a> |                                                    |
| 06/03/2011 | <a href="#">5190026</a> | Agree                                              |
| 06/03/2011 | <a href="#">5191909</a> |                                                    |
| 06/04/2011 | <a href="#">5192888</a> | same as above                                      |
| 06/06/2011 | <a href="#">5194764</a> | same comments as in adults above                   |
| 06/06/2011 | <a href="#">5196265</a> | I agree                                            |
| 06/06/2011 | <a href="#">5196255</a> | would also leave as 4a without additional features |
| 06/06/2011 | <a href="#">5196667</a> | agree                                              |
| 06/07/2011 | <a href="#">5197653</a> | agree but not a peer doc so maybe talking rubbish! |
| 06/07/2011 | <a href="#">5197740</a> | agree                                              |
| 06/07/2011 | <a href="#">5198378</a> | Agree.                                             |
| 06/19/2011 | <a href="#">5244454</a> | Agree                                              |

4d. CLASSICAL=TYPICAL CD: PEDIATRIC SETTING.  
If you disagree with the added definition of "4c", please  
a) suggest an alternative definition; b) list the  
references that support your stance, and if possible  
add their PMID-number.

|            |                         |  |
|------------|-------------------------|--|
| 06/01/2011 | <a href="#">5184241</a> |  |
| 06/01/2011 | <a href="#">5184342</a> |  |
| 06/02/2011 | <a href="#">5187394</a> |  |
| 06/02/2011 | <a href="#">5187902</a> |  |
| 06/02/2011 | <a href="#">5188116</a> |  |
| 06/03/2011 | <a href="#">5190026</a> |  |
| 06/03/2011 | <a href="#">5191909</a> |  |
| 06/04/2011 | <a href="#">5192888</a> |  |
| 06/06/2011 | <a href="#">5194764</a> |  |
| 06/06/2011 | <a href="#">5196265</a> |  |
| 06/06/2011 | <a href="#">5196255</a> |  |
| 06/06/2011 | <a href="#">5196667</a> |  |
| 06/07/2011 | <a href="#">5197653</a> |  |
| 06/07/2011 | <a href="#">5197740</a> |  |
| 06/07/2011 | <a href="#">5198378</a> |  |
| 06/19/2011 | <a href="#">5244454</a> |  |

5a. NON-CLASSICAL=ATYPICAL CD: *"a gluten-induced enteropathy clinically expressed by some of the following manifestations but without weight loss: Gastrointestinal symptoms: any GI symptom (abdominal pain, GE reflux symptoms, vomiting, constipation, IBS-like symptoms, distension, or bloating, borborigms, etc); Extraintestinal manifestations without GI symptoms: Metabolic: Thyroid dysfunction (hypo/hyper), cramps, tetany, paresthesiae, edema, etc. Neurologic findings: gluten ataxia, epilepsy, peripheral neuropathy, depression, etc. Reproductive (infertility, menstrual abnormalities, recurrent abortion, early menopause, amenorrhea), Oral/cutaneous: DH, alopecia, aphthae, dental enamel defects, psoriasis, glossitis), Skeletal: bone pain, rickets. Mono- or oligo-symptomatic clinical course (any of the former symptoms), patients that may also have significant nutritional deficiencies findings such as iron deficiency, recurrent abdominal pain, and mood changes."* AGREE/NOT AGREE? Please motivate

(explanatory motives/texts are welcome!).

|            |                         |                                                                                                                                                                                                                                                                                                                                                                                                      |
|------------|-------------------------|------------------------------------------------------------------------------------------------------------------------------------------------------------------------------------------------------------------------------------------------------------------------------------------------------------------------------------------------------------------------------------------------------|
| 06/01/2011 | <a href="#">5184241</a> | disagree                                                                                                                                                                                                                                                                                                                                                                                             |
| 06/01/2011 | <a href="#">5184342</a> | I agree                                                                                                                                                                                                                                                                                                                                                                                              |
| 06/02/2011 | <a href="#">5187394</a> | I have doubts about including gastrointestinal symptoms without weight loss.                                                                                                                                                                                                                                                                                                                         |
| 06/02/2011 | <a href="#">5187902</a> | mostly agree: similar to 4a, would someone with IBS type symptoms and iron deficiency really be considered non-classical/atypical                                                                                                                                                                                                                                                                    |
| 06/02/2011 | <a href="#">5188116</a> | Disagree - the definition is too long and cumbersome                                                                                                                                                                                                                                                                                                                                                 |
| 06/03/2011 | <a href="#">5190026</a> | This is what I mean with "subclinical CD".                                                                                                                                                                                                                                                                                                                                                           |
| 06/03/2011 | <a href="#">5191909</a> |                                                                                                                                                                                                                                                                                                                                                                                                      |
| 06/04/2011 | <a href="#">5192888</a> | disagree. see my comments above                                                                                                                                                                                                                                                                                                                                                                      |
| 06/06/2011 | <a href="#">5194764</a> | disagree; Wide range of abdominal symptoms as mentioned here are typical presentations of celiac disease. Atypical is not a good word as majority of celiacs nowadays present with these kind of symptoms. Tetany is a rare presentation related in severe hypocalcemia due to malabsorption...my opinion. Thyroid dysfunction is is a symptom or risk group of CD. Psoriasis is not so clear thing. |
| 06/06/2011 | <a href="#">5196265</a> | I agree but I think that gluten ataxia should not be include among the symptoms                                                                                                                                                                                                                                                                                                                      |
| 06/06/2011 | <a href="#">5196255</a> | agree, but also see NICE guidelines <a href="http://guidance.nice.org.uk/CG86">http://guidance.nice.org.uk/CG86</a>                                                                                                                                                                                                                                                                                  |
| 06/06/2011 | <a href="#">5196667</a> | agree                                                                                                                                                                                                                                                                                                                                                                                                |
| 06/07/2011 | <a href="#">5197653</a> | yes agree                                                                                                                                                                                                                                                                                                                                                                                            |
| 06/07/2011 | <a href="#">5197740</a> | I would take epilepsy out                                                                                                                                                                                                                                                                                                                                                                            |
| 06/07/2011 | <a href="#">5198378</a> | Not agree, this mode of presentation is "Typical CD" these days.                                                                                                                                                                                                                                                                                                                                     |
| 06/19/2011 | <a href="#">5244454</a> | Agree                                                                                                                                                                                                                                                                                                                                                                                                |

**5b. NON-CLASSICAL=ATYPICAL CD: If you disagree with the definition above, please a) suggest an alternative definition; b) list the references that support your stance, and if possible add their PMID-number.**

|            |                         |                                                                                                                                                                                                                           |
|------------|-------------------------|---------------------------------------------------------------------------------------------------------------------------------------------------------------------------------------------------------------------------|
| 06/01/2011 | <a href="#">5184241</a> | weight loss in the absence of a malabsorption syndrome is atypical                                                                                                                                                        |
| 06/01/2011 | <a href="#">5184342</a> |                                                                                                                                                                                                                           |
| 06/02/2011 | <a href="#">5187394</a> |                                                                                                                                                                                                                           |
| 06/02/2011 | <a href="#">5187902</a> |                                                                                                                                                                                                                           |
| 06/02/2011 | <a href="#">5188116</a> | "a gluten-induced enteropathy presenting without signs and symptoms of severe malabsorption. Presenting features may include mild gastrointestinal signs or symptoms or extra-intestinal manifestations of celiac disease |
| 06/03/2011 | <a href="#">5190026</a> |                                                                                                                                                                                                                           |
| 06/03/2011 | <a href="#">5191909</a> |                                                                                                                                                                                                                           |
| 06/04/2011 | <a href="#">5192888</a> |                                                                                                                                                                                                                           |
| 06/06/2011 | <a href="#">5194764</a> | I would talk classical=typical with abdominal symptoms and signs of malabsorption (what ever); atypical=extraintestinal                                                                                                   |
| 06/06/2011 | <a href="#">5196265</a> |                                                                                                                                                                                                                           |
| 06/06/2011 | <a href="#">5196255</a> |                                                                                                                                                                                                                           |
| 06/06/2011 | <a href="#">5196667</a> |                                                                                                                                                                                                                           |
| 06/07/2011 | <a href="#">5197653</a> | agree                                                                                                                                                                                                                     |
| 06/07/2011 | <a href="#">5197740</a> |                                                                                                                                                                                                                           |
| 06/07/2011 | <a href="#">5198378</a> |                                                                                                                                                                                                                           |
| 06/19/2011 | <a href="#">5244454</a> | Veru unclear if infertility is a sign of CD                                                                                                                                                                               |

**6a. CELIAC CRISIS: "Acute onset or rapid progression of gastrointestinal symptoms attributable to celiac**



*disease requiring hospitalization and/or parenteral nutrition along with at least 2 of the following: a) Signs of severe dehydration including hemodynamic instability and/or orthostatic changes, b) Neurologic dysfunction, c) Renal dysfunction, creatinine level, >2.0 g/dL, d) Metabolic acidosis, pH <7.35, e) Hypoproteinemia (albumin level, <3.0 g/dL), f) Abnormal electrolyte levels including hypernatremia/hyponatremia, hypocalcemia, hypokalemia, or hypomagnesemia, g) Weight loss <10 lb". AGREE/NOT AGREE? Please motivate (explanatory motives/texts are welcome!).*

|            |                         |                                                               |
|------------|-------------------------|---------------------------------------------------------------|
| 06/01/2011 | <a href="#">5184241</a> | agree                                                         |
| 06/01/2011 | <a href="#">5184342</a> | I agree                                                       |
| 06/02/2011 | <a href="#">5187394</a> | agree                                                         |
| 06/02/2011 | <a href="#">5187902</a> | agree                                                         |
| 06/02/2011 | <a href="#">5188116</a> | Agree apart from typo of weight loss GREATER THAN 10 pounds.  |
| 06/03/2011 | <a href="#">5190026</a> | Agree (but does this really happen?). How much is 10lb in kg? |
| 06/03/2011 | <a href="#">5191909</a> |                                                               |
| 06/04/2011 | <a href="#">5192888</a> | agree                                                         |
| 06/06/2011 | <a href="#">5194764</a> | WE have no such cases nowadays.                               |
| 06/06/2011 | <a href="#">5196265</a> | I agree                                                       |
| 06/06/2011 | <a href="#">5196255</a> | agree                                                         |
| 06/06/2011 | <a href="#">5196667</a> | agree                                                         |
| 06/07/2011 | <a href="#">5197653</a> | agree                                                         |
| 06/07/2011 | <a href="#">5197740</a> | agree                                                         |
| 06/07/2011 | <a href="#">5198378</a> | Agree.                                                        |
| 06/19/2011 | <a href="#">5244454</a> | Agree                                                         |

**6b. CELIAC CRISIS: If you disagree with the definition above, please a) suggest an alternative definition; b) list the references that support your stance, and if possible add their PMID-number.**

|            |                         |  |
|------------|-------------------------|--|
| 06/01/2011 | <a href="#">5184241</a> |  |
| 06/01/2011 | <a href="#">5184342</a> |  |
| 06/02/2011 | <a href="#">5187394</a> |  |
| 06/02/2011 | <a href="#">5187902</a> |  |
| 06/02/2011 | <a href="#">5188116</a> |  |
| 06/03/2011 | <a href="#">5190026</a> |  |
| 06/03/2011 | <a href="#">5191909</a> |  |
| 06/04/2011 | <a href="#">5192888</a> |  |
| 06/06/2011 | <a href="#">5194764</a> |  |
| 06/06/2011 | <a href="#">5196265</a> |  |
| 06/06/2011 | <a href="#">5196255</a> |  |

|            |                         |  |
|------------|-------------------------|--|
| 06/06/2011 | <a href="#">5196667</a> |  |
| 06/07/2011 | <a href="#">5197653</a> |  |
| 06/07/2011 | <a href="#">5197740</a> |  |
| 06/07/2011 | <a href="#">5198378</a> |  |
| 06/19/2011 | <a href="#">5244454</a> |  |

**7a. REFRACTORY CELIAC DISEASE: "*persistent or recurrent malabsorptive symptoms and signs (for examples diarrhea, abdominal pain, involuntary loss of weight, low hemoglobin, hypoalbuminia) associated with persistent or recurrent villous atrophy with crypt hyperplasia and increased intraepithelial lymphocytes (IEL) in spite of a strict gluten free diet for more than 12 months (or severe persistent symptoms independently of the duration of GFD) in the absence of other causes of villous atrophy or malignant complication (18) and after the confirmation of the initial diagnosis of celiac disease.*" AGREE/NOT AGREE? Please motivate (explanatory motives/texts are welcome!).**

|            |                         |                                                                                                                                                                                                                                                  |
|------------|-------------------------|--------------------------------------------------------------------------------------------------------------------------------------------------------------------------------------------------------------------------------------------------|
| 06/01/2011 | <a href="#">5184241</a> | agree                                                                                                                                                                                                                                            |
| 06/01/2011 | <a href="#">5184342</a> | I partially agree with the definition. My concern is related with the rule of: "for more than 12 month", because there is a proportion of cases having a refractory and severe outcome from the time of diagnosis of CD ("primarily refractory). |
| 06/02/2011 | <a href="#">5187394</a> | cite the serology status? I personally do not think that antibodies should be present in RCD, but I know that others say they might                                                                                                              |
| 06/02/2011 | <a href="#">5187902</a> | agree                                                                                                                                                                                                                                            |
| 06/02/2011 | <a href="#">5188116</a> | Agree but shorten                                                                                                                                                                                                                                |
| 06/03/2011 | <a href="#">5190026</a> | Agree but I would focus on the persistence of villous atrophy rather than symptoms (see below)                                                                                                                                                   |
| 06/03/2011 | <a href="#">5191909</a> |                                                                                                                                                                                                                                                  |
| 06/04/2011 | <a href="#">5192888</a> | agree                                                                                                                                                                                                                                            |
| 06/06/2011 | <a href="#">5194764</a> | In adults mycosa does not heal always withind 12 weeks, takes sometimes more time. What are those asymptomatic with persitent villous atrophy,Aliment Pharmacol Ther. 2007 May 15;25(10):1237-45.                                                |
| 06/06/2011 | <a href="#">5196265</a> | I agree                                                                                                                                                                                                                                          |
| 06/06/2011 | <a href="#">5196255</a> | define increased IEL counts i.e. >25                                                                                                                                                                                                             |
| 06/06/2011 | <a href="#">5196667</a> | agree                                                                                                                                                                                                                                            |
| 06/07/2011 | <a href="#">5197653</a> | agree                                                                                                                                                                                                                                            |
| 06/07/2011 | <a href="#">5197740</a> | agree                                                                                                                                                                                                                                            |
| 06/07/2011 | <a href="#">5198378</a> | Agree.                                                                                                                                                                                                                                           |
| 06/19/2011 | <a href="#">5244454</a> | Agree                                                                                                                                                                                                                                            |

**7b. REFRACTORY CELIAC DISEASE: If you disagree with the definition above, please a) suggest an**

alternative definition; b) list the references that support your stance, and if possible add their PMID-number.

|            |                         |                                                                                                                                                                                                                                                                                                                                                                                                                                                                                                                                                                                        |
|------------|-------------------------|----------------------------------------------------------------------------------------------------------------------------------------------------------------------------------------------------------------------------------------------------------------------------------------------------------------------------------------------------------------------------------------------------------------------------------------------------------------------------------------------------------------------------------------------------------------------------------------|
| 06/01/2011 | <a href="#">5184241</a> |                                                                                                                                                                                                                                                                                                                                                                                                                                                                                                                                                                                        |
| 06/01/2011 | <a href="#">5184342</a> |                                                                                                                                                                                                                                                                                                                                                                                                                                                                                                                                                                                        |
| 06/02/2011 | <a href="#">5187394</a> |                                                                                                                                                                                                                                                                                                                                                                                                                                                                                                                                                                                        |
| 06/02/2011 | <a href="#">5187902</a> |                                                                                                                                                                                                                                                                                                                                                                                                                                                                                                                                                                                        |
| 06/02/2011 | <a href="#">5188116</a> | Suggest shortening to: "persistent or recurrent malabsorptive symptoms and signs associated with persistent or recurrent villous atrophy with crypt hyperplasia and increased intraepithelial lymphocytes in spite of a strict gluten free diet for more than 12 months (or severe persistent symptoms independently of the duration of GFD) in the absence of other causes of villous atrophy or malignant complication (18) and after the confirmation of the initial diagnosis of celiac disease."                                                                                  |
| 06/03/2011 | <a href="#">5190026</a> | persistent or recurrent villous atrophy with crypt hyperplasia and increased intraepithelial lymphocytes (IEL) associated with persistent or recurrent malabsorptive symptoms and signs (for examples diarrhea, abdominal pain, involuntary loss of weight, low hemoglobin, hypoalbuminemia) in spite of a strict gluten free diet for more than 12 months (or severe persistent symptoms independently of the duration of GFD) in the absence of other causes of villous atrophy or malignant complication (18) and after the confirmation of the initial diagnosis of celiac disease |
| 06/03/2011 | <a href="#">5191909</a> |                                                                                                                                                                                                                                                                                                                                                                                                                                                                                                                                                                                        |
| 06/04/2011 | <a href="#">5192888</a> |                                                                                                                                                                                                                                                                                                                                                                                                                                                                                                                                                                                        |
| 06/06/2011 | <a href="#">5194764</a> |                                                                                                                                                                                                                                                                                                                                                                                                                                                                                                                                                                                        |
| 06/06/2011 | <a href="#">5196265</a> |                                                                                                                                                                                                                                                                                                                                                                                                                                                                                                                                                                                        |
| 06/06/2011 | <a href="#">5196255</a> |                                                                                                                                                                                                                                                                                                                                                                                                                                                                                                                                                                                        |
| 06/06/2011 | <a href="#">5196667</a> |                                                                                                                                                                                                                                                                                                                                                                                                                                                                                                                                                                                        |
| 06/07/2011 | <a href="#">5197653</a> |                                                                                                                                                                                                                                                                                                                                                                                                                                                                                                                                                                                        |
| 06/07/2011 | <a href="#">5197740</a> |                                                                                                                                                                                                                                                                                                                                                                                                                                                                                                                                                                                        |
| 06/07/2011 | <a href="#">5198378</a> |                                                                                                                                                                                                                                                                                                                                                                                                                                                                                                                                                                                        |
| 06/19/2011 | <a href="#">5244454</a> | reference 18 should be removed from the definition                                                                                                                                                                                                                                                                                                                                                                                                                                                                                                                                     |

**8a. SILENT CELIAC DISEASE: "A) positive serology (EMA, tTG) and the presence of a gluten-sensitive enteropathy not accompanied by any symptoms and identified through testing because of a family history of celiac disease or celiac disease-associated condition, or population screening; or B) individual with CD identified through population-screening." AGREE/NOT AGREE? Please motivate (explanatory motives/texts are welcome!).**

|            |                         |                                                                                                                                                                                                                                                                                              |
|------------|-------------------------|----------------------------------------------------------------------------------------------------------------------------------------------------------------------------------------------------------------------------------------------------------------------------------------------|
| 06/01/2011 | <a href="#">5184241</a> | agree                                                                                                                                                                                                                                                                                        |
| 06/01/2011 | <a href="#">5184342</a> | I agree                                                                                                                                                                                                                                                                                      |
| 06/02/2011 | <a href="#">5187394</a> | agree                                                                                                                                                                                                                                                                                        |
| 06/02/2011 | <a href="#">5187902</a> | How is this different from asymptomatic or subclinical above? Should these be combined into one inclusive definition? If not, they should be clearly differentiated. Further, what about someone with anemia or osteoporosis, they may be asymptomatic but are they considered truly silent? |
| 06/02/2011 | <a href="#">5188116</a> | Agree but would shorten                                                                                                                                                                                                                                                                      |
| 06/03/2011 | <a href="#">5190026</a> | Not agree                                                                                                                                                                                                                                                                                    |
| 06/03/2011 | <a href="#">5191909</a> |                                                                                                                                                                                                                                                                                              |
| 06/04/2011 | <a href="#">5192888</a> | agree (possibly, this can be defined as asymptomatic)-                                                                                                                                                                                                                                       |
| 06/06/2011 | <a href="#">5194764</a> | Why use silent- asymptomatic was already above.                                                                                                                                                                                                                                              |

|            |                         |                                                                                  |
|------------|-------------------------|----------------------------------------------------------------------------------|
| 06/06/2011 | <a href="#">5196265</a> | The sentence B) is included in sentence A), should be removed.                   |
| 06/06/2011 | <a href="#">5196255</a> | define histology of this as increased IELs (<25/ 100 enterocytes) PMID: 20398668 |
| 06/06/2011 | <a href="#">5196667</a> | a agree                                                                          |
| 06/07/2011 | <a href="#">5197653</a> | agree                                                                            |
| 06/07/2011 | <a href="#">5197740</a> | this is the same as asymptomatic                                                 |
| 06/07/2011 | <a href="#">5198378</a> | Agree with A but not with B.                                                     |
| 06/19/2011 | <a href="#">5244454</a> | Agree                                                                            |

**8b. SILENT CELIAC DISEASE: If you disagree with the definition above, please a) suggest an alternative definition; b) list the references that support your stance, and if possible add their PMID-number.**

|            |                         |                                                                                                                                                                                                                                           |
|------------|-------------------------|-------------------------------------------------------------------------------------------------------------------------------------------------------------------------------------------------------------------------------------------|
| 06/01/2011 | <a href="#">5184241</a> |                                                                                                                                                                                                                                           |
| 06/01/2011 | <a href="#">5184342</a> |                                                                                                                                                                                                                                           |
| 06/02/2011 | <a href="#">5187394</a> |                                                                                                                                                                                                                                           |
| 06/02/2011 | <a href="#">5187902</a> |                                                                                                                                                                                                                                           |
| 06/02/2011 | <a href="#">5188116</a> | Would simplify and shorten to:<br>"Positive serology (EMA, tTG) and the presence of a gluten-sensitive enteropathy not accompanied by any other signs or symptoms of celiac disease"                                                      |
| 06/03/2011 | <a href="#">5190026</a> | I do not understand the difference with "asymptomatic CD". Anyway I would write "individual with CD not accompanied by any symptoms and identified through testing because of a family history of celiac disease or population screening" |
| 06/03/2011 | <a href="#">5191909</a> |                                                                                                                                                                                                                                           |
| 06/04/2011 | <a href="#">5192888</a> |                                                                                                                                                                                                                                           |
| 06/06/2011 | <a href="#">5194764</a> |                                                                                                                                                                                                                                           |
| 06/06/2011 | <a href="#">5196265</a> |                                                                                                                                                                                                                                           |
| 06/06/2011 | <a href="#">5196255</a> |                                                                                                                                                                                                                                           |
| 06/06/2011 | <a href="#">5196667</a> |                                                                                                                                                                                                                                           |
| 06/07/2011 | <a href="#">5197653</a> |                                                                                                                                                                                                                                           |
| 06/07/2011 | <a href="#">5197740</a> |                                                                                                                                                                                                                                           |
| 06/07/2011 | <a href="#">5198378</a> | Celiac disease found by population screening can also be clinically significant.                                                                                                                                                          |
| 06/19/2011 | <a href="#">5244454</a> |                                                                                                                                                                                                                                           |

**9a. GLUTEN (THE SUBSTANCE): *"complex of proteins (prolamins and glutenins) of cereals. The component proteins of wheat gluten are the gliadins and glutenin subunits."* AGREE/NOT AGREE? Please motivate (explanatory motives/texts are welcome!).**

|            |                         |                                                                                                                                                                                                 |
|------------|-------------------------|-------------------------------------------------------------------------------------------------------------------------------------------------------------------------------------------------|
| 06/01/2011 | <a href="#">5184241</a> | disagree                                                                                                                                                                                        |
| 06/01/2011 | <a href="#">5184342</a> | I agree                                                                                                                                                                                         |
| 06/02/2011 | <a href="#">5187394</a> | agree                                                                                                                                                                                           |
| 06/02/2011 | <a href="#">5187902</a> | agree                                                                                                                                                                                           |
| 06/02/2011 | <a href="#">5188116</a> | I have a question. Are we putting forward a biochemical definition or are we alluding to those cereal proteins that are toxic in CD? I'm not sure that the current definition does either well. |
| 06/03/2011 | <a href="#">5190026</a> | Not agree. What about water soluble albumins? We cannot forget about them.                                                                                                                      |
| 06/03/2011 | <a href="#">5191909</a> |                                                                                                                                                                                                 |
| 06/04/2011 | <a href="#">5192888</a> | agree                                                                                                                                                                                           |

|            |                         |                                      |
|------------|-------------------------|--------------------------------------|
| 06/06/2011 | <a href="#">5194764</a> | Wheat rye barley should be mentioned |
| 06/06/2011 | <a href="#">5196265</a> | I agree                              |
| 06/06/2011 | <a href="#">5196255</a> | agree                                |
| 06/06/2011 | <a href="#">5196667</a> | agree                                |
| 06/07/2011 | <a href="#">5197653</a> | agree                                |
| 06/07/2011 | <a href="#">5197740</a> | agree                                |
| 06/07/2011 | <a href="#">5198378</a> | Agree.                               |
| 06/19/2011 | <a href="#">5244454</a> | Agree                                |

**9b. GLUTEN (SUBSTANCE):** If you disagree with the definition above, please a) suggest an alternative definition; b) list the references that support your stance, and if possible add their PMID-number.

|            |                         |                                                                                                                               |
|------------|-------------------------|-------------------------------------------------------------------------------------------------------------------------------|
| 06/01/2011 | <a href="#">5184241</a> | the protein component of wheat, rye and barley                                                                                |
| 06/01/2011 | <a href="#">5184342</a> |                                                                                                                               |
| 06/02/2011 | <a href="#">5187394</a> |                                                                                                                               |
| 06/02/2011 | <a href="#">5187902</a> |                                                                                                                               |
| 06/02/2011 | <a href="#">5188116</a> |                                                                                                                               |
| 06/03/2011 | <a href="#">5190026</a> | The complex of non-water soluble proteins (prolamins and glutenins) of some cereals toxic to CD patients (wheat, rye, barley) |
| 06/03/2011 | <a href="#">5191909</a> |                                                                                                                               |
| 06/04/2011 | <a href="#">5192888</a> |                                                                                                                               |
| 06/06/2011 | <a href="#">5194764</a> |                                                                                                                               |
| 06/06/2011 | <a href="#">5196265</a> |                                                                                                                               |
| 06/06/2011 | <a href="#">5196255</a> |                                                                                                                               |
| 06/06/2011 | <a href="#">5196667</a> |                                                                                                                               |
| 06/07/2011 | <a href="#">5197653</a> |                                                                                                                               |
| 06/07/2011 | <a href="#">5197740</a> |                                                                                                                               |
| 06/07/2011 | <a href="#">5198378</a> |                                                                                                                               |
| 06/19/2011 | <a href="#">5244454</a> |                                                                                                                               |

**10a. OVERT=SYMPTOMATIC CELIAC DISEASE:**  
*"celiac disease characterized by clinically evident gluten-related symptoms, either gastrointestinal (dyspepsia, diarrhea, bloating) or extraintestinal (neurological symptoms, fatigue). According to this definition symptomatic and overt celiac disease should be considered synonyms."* AGREE/NOT AGREE?  
 Please motivate (explanatory motives/texts are welcome!).

|            |                         |         |
|------------|-------------------------|---------|
| 06/01/2011 | <a href="#">5184241</a> | agree   |
| 06/01/2011 | <a href="#">5184342</a> | I agree |
| 06/02/2011 | <a href="#">5187394</a> | agree   |
| 06/02/2011 | <a href="#">5187902</a> | agree   |
| 06/02/2011 | <a href="#">5188116</a> |         |

|            |                         |                                                 |
|------------|-------------------------|-------------------------------------------------|
| 06/03/2011 | <a href="#">5190026</a> | I agree but it is the same of clasical=atypical |
| 06/03/2011 | <a href="#">5191909</a> |                                                 |
| 06/04/2011 | <a href="#">5192888</a> | is this necessary?                              |
| 06/06/2011 | <a href="#">5194764</a> | agree                                           |
| 06/06/2011 | <a href="#">5196265</a> | I agree                                         |
| 06/06/2011 | <a href="#">5196255</a> | agree                                           |
| 06/06/2011 | <a href="#">5196667</a> | agree                                           |
| 06/07/2011 | <a href="#">5197653</a> | agree                                           |
| 06/07/2011 | <a href="#">5197740</a> | agree                                           |
| 06/07/2011 | <a href="#">5198378</a> | Agree.                                          |
| 06/19/2011 | <a href="#">5244454</a> | Agree                                           |

10b. OVERT=SYMPTOMATIC CELIAC DISEASE: If you disagree with the definition above, please a) suggest an alternative definition; b) list the references that support your stance, and if possible add their PMID-number.

|            |                         |                                                                                                                                                  |
|------------|-------------------------|--------------------------------------------------------------------------------------------------------------------------------------------------|
| 06/01/2011 | <a href="#">5184241</a> | would not include all the different definitions for the same entity                                                                              |
| 06/01/2011 | <a href="#">5184342</a> |                                                                                                                                                  |
| 06/02/2011 | <a href="#">5187394</a> |                                                                                                                                                  |
| 06/02/2011 | <a href="#">5187902</a> |                                                                                                                                                  |
| 06/02/2011 | <a href="#">5188116</a> | I would shorten to:<br>"celiac disease characterized by clinically evident gluten-related symptoms, either gastrointestinal or extraintestinal." |
| 06/03/2011 | <a href="#">5190026</a> |                                                                                                                                                  |
| 06/03/2011 | <a href="#">5191909</a> |                                                                                                                                                  |
| 06/04/2011 | <a href="#">5192888</a> |                                                                                                                                                  |
| 06/06/2011 | <a href="#">5194764</a> |                                                                                                                                                  |
| 06/06/2011 | <a href="#">5196265</a> |                                                                                                                                                  |
| 06/06/2011 | <a href="#">5196255</a> |                                                                                                                                                  |
| 06/06/2011 | <a href="#">5196667</a> |                                                                                                                                                  |
| 06/07/2011 | <a href="#">5197653</a> |                                                                                                                                                  |
| 06/07/2011 | <a href="#">5197740</a> |                                                                                                                                                  |
| 06/07/2011 | <a href="#">5198378</a> |                                                                                                                                                  |
| 06/19/2011 | <a href="#">5244454</a> |                                                                                                                                                  |

11a. POTENTIAL CELIAC DISEASE: *"Patients in whom celiac disease is possible but not provable as the patient is already on a gluten-free diet. E.g. someone who had a history of GI symptoms and one or more of the following: family history of celiac disease, personal history of associated autoimmune disorder, positive HLA DQ2/DQ8, but is currently on a long term GFD with negative serology and/or biopsy."*  
AGREE/NOT AGREE? Please motivate (explanatory

## motives/texts are welcome!).

|            |                         |                                                                                                                                                                                                                                                                                                          |
|------------|-------------------------|----------------------------------------------------------------------------------------------------------------------------------------------------------------------------------------------------------------------------------------------------------------------------------------------------------|
| 06/01/2011 | <a href="#">5184241</a> | disagree                                                                                                                                                                                                                                                                                                 |
| 06/01/2011 | <a href="#">5184342</a> | I agree with the definition but I suggest that the term "potential CD" should be abandoned                                                                                                                                                                                                               |
| 06/02/2011 | <a href="#">5187394</a> | agree                                                                                                                                                                                                                                                                                                    |
| 06/02/2011 | <a href="#">5187902</a> | agree                                                                                                                                                                                                                                                                                                    |
| 06/02/2011 | <a href="#">5188116</a> |                                                                                                                                                                                                                                                                                                          |
| 06/03/2011 | <a href="#">5190026</a> | DO NOT AGREE AT ALL                                                                                                                                                                                                                                                                                      |
| 06/03/2011 | <a href="#">5191909</a> |                                                                                                                                                                                                                                                                                                          |
| 06/04/2011 | <a href="#">5192888</a> | disagree. This will generate great confusion since under this definition we will have a huge mix bag of cases, the vast majority probably not related to CD.                                                                                                                                             |
| 06/06/2011 | <a href="#">5194764</a> | not agree. Potential CD is often regarded as EMA/TTG2ab positive subjects (with celiac-type HLA) who still have normal small bowel mucosal villous architecture. These cases may have already gluten-sensitive symptoms. Also early stage celiac disease is used in this context or minorenteropathy CD. |
| 06/06/2011 | <a href="#">5196265</a> | I agree                                                                                                                                                                                                                                                                                                  |
| 06/06/2011 | <a href="#">5196255</a> | agree                                                                                                                                                                                                                                                                                                    |
| 06/06/2011 | <a href="#">5196667</a> | agree                                                                                                                                                                                                                                                                                                    |
| 06/07/2011 | <a href="#">5197653</a> | agree                                                                                                                                                                                                                                                                                                    |
| 06/07/2011 | <a href="#">5197740</a> | what about patients who have a normal biopsy initially (on normal diet) followed by an abnormal one at a later date                                                                                                                                                                                      |
| 06/07/2011 | <a href="#">5198378</a> | Not agree. The clinical settings described above fits in very few cases with actual celiac disease.                                                                                                                                                                                                      |
| 06/19/2011 | <a href="#">5244454</a> | Agree                                                                                                                                                                                                                                                                                                    |

## 11b. POTENTIAL CELIAC DISEASE: If you disagree with the definition above, please a) suggest an alternative definition; b) list the references that support your stance, and if possible add their PMID-number.

|            |                         |                                                                                                                                                                                                                                                                                                                                                                                                     |
|------------|-------------------------|-----------------------------------------------------------------------------------------------------------------------------------------------------------------------------------------------------------------------------------------------------------------------------------------------------------------------------------------------------------------------------------------------------|
| 06/01/2011 | <a href="#">5184241</a> | I like marsh's definition. someone who has had or will have CD but has a normal biopsy while eating gluten                                                                                                                                                                                                                                                                                          |
| 06/01/2011 | <a href="#">5184342</a> |                                                                                                                                                                                                                                                                                                                                                                                                     |
| 06/02/2011 | <a href="#">5187394</a> |                                                                                                                                                                                                                                                                                                                                                                                                     |
| 06/02/2011 | <a href="#">5187902</a> |                                                                                                                                                                                                                                                                                                                                                                                                     |
| 06/02/2011 | <a href="#">5188116</a> | I would shorten to:<br>Patients in whom celiac disease is possible but not provable as the patient is already on a gluten-free diet.                                                                                                                                                                                                                                                                |
| 06/03/2011 | <a href="#">5190026</a> | According to Ann Ferguson who defined the condition (Gut 1993 Feb;34:150-1 PMID: 8432463), potential CD is a condition characterised by positive endomysial antibodies (please, note that positive transglutaminase antibodies with negative EMA are not enough) but an architecturally normal duodenal mucosa (so an increased IEL count is neither necessary or sufficient to make the diagnosis) |
| 06/03/2011 | <a href="#">5191909</a> |                                                                                                                                                                                                                                                                                                                                                                                                     |
| 06/04/2011 | <a href="#">5192888</a> | cases in which the autoimmune serology (TTG and EMA) is positive, but the enteropathy is not present                                                                                                                                                                                                                                                                                                |
| 06/06/2011 | <a href="#">5194764</a> | some publications on this; Clin Gastroenterol Hepatol. 2011 Apr;9(4):320-5; J Clin Gastroenterol. 2010 Nov 8. [Epub ahead of print]<br><br>PMID: 21063208; J Pediatr. 2010 Sep;157(3):373-80, 380.e1; Gastroenterology. 2009 Mar;136(3):816-23.                                                                                                                                                     |
| 06/06/2011 | <a href="#">5196265</a> |                                                                                                                                                                                                                                                                                                                                                                                                     |
| 06/06/2011 | <a href="#">5196255</a> |                                                                                                                                                                                                                                                                                                                                                                                                     |
| 06/06/2011 | <a href="#">5196667</a> |                                                                                                                                                                                                                                                                                                                                                                                                     |
| 06/07/2011 | <a href="#">5197653</a> |                                                                                                                                                                                                                                                                                                                                                                                                     |
| 06/07/2011 | <a href="#">5197740</a> |                                                                                                                                                                                                                                                                                                                                                                                                     |

|            |                         |                                                                                                                                |
|------------|-------------------------|--------------------------------------------------------------------------------------------------------------------------------|
| 06/07/2011 | <a href="#">5198378</a> | See Brottveit et al Am J Gastroenterol 2011 PMID:21364548                                                                      |
| 06/19/2011 | <a href="#">5244454</a> | Is it enough to state that a patient has potential celiac disease just because he/she eats GFD and has an autoimmune disorder? |

**12a. GLUTEN SENSITIVITY: This term should be ABANDONED. Instead the term "NON-CELIAC GLUTEN SENSITIVITY" should be used. AGREE/NOT AGREE? Please motivate (explanatory motives/texts are welcome!).**

|            |                         |                                                                                                                                                                                                                                                                                                                                                                                                                                                                                                                                                                                                                                                                                                                 |
|------------|-------------------------|-----------------------------------------------------------------------------------------------------------------------------------------------------------------------------------------------------------------------------------------------------------------------------------------------------------------------------------------------------------------------------------------------------------------------------------------------------------------------------------------------------------------------------------------------------------------------------------------------------------------------------------------------------------------------------------------------------------------|
| 06/01/2011 | <a href="#">5184241</a> | agree                                                                                                                                                                                                                                                                                                                                                                                                                                                                                                                                                                                                                                                                                                           |
| 06/01/2011 | <a href="#">5184342</a> | I fully agree                                                                                                                                                                                                                                                                                                                                                                                                                                                                                                                                                                                                                                                                                                   |
| 06/02/2011 | <a href="#">5187394</a> | agree                                                                                                                                                                                                                                                                                                                                                                                                                                                                                                                                                                                                                                                                                                           |
| 06/02/2011 | <a href="#">5187902</a> | disagree                                                                                                                                                                                                                                                                                                                                                                                                                                                                                                                                                                                                                                                                                                        |
| 06/02/2011 | <a href="#">5188116</a> | Agree<br>Non-celiac gluten intolerance may be worth adding as a synonomous term                                                                                                                                                                                                                                                                                                                                                                                                                                                                                                                                                                                                                                 |
| 06/03/2011 | <a href="#">5190026</a> | Do not agree                                                                                                                                                                                                                                                                                                                                                                                                                                                                                                                                                                                                                                                                                                    |
| 06/03/2011 | <a href="#">5191909</a> |                                                                                                                                                                                                                                                                                                                                                                                                                                                                                                                                                                                                                                                                                                                 |
| 06/04/2011 | <a href="#">5192888</a> | disagree. CD is not a gluten sensitivity since there is clear evidence that is an autoimmune reaction to gluten exposure. Therefore, non-celiac gluten sensitivity is not necessary                                                                                                                                                                                                                                                                                                                                                                                                                                                                                                                             |
| 06/06/2011 | <a href="#">5194764</a> | agree                                                                                                                                                                                                                                                                                                                                                                                                                                                                                                                                                                                                                                                                                                           |
| 06/06/2011 | <a href="#">5196265</a> | I agree                                                                                                                                                                                                                                                                                                                                                                                                                                                                                                                                                                                                                                                                                                         |
| 06/06/2011 | <a href="#">5196255</a> | agree                                                                                                                                                                                                                                                                                                                                                                                                                                                                                                                                                                                                                                                                                                           |
| 06/06/2011 | <a href="#">5196667</a> | agree                                                                                                                                                                                                                                                                                                                                                                                                                                                                                                                                                                                                                                                                                                           |
| 06/07/2011 | <a href="#">5197653</a> | not agree. I think the term potential celiac and gluten sensitivity maybe interchangeable<br><br>25 Ball AJ, Hadjivassiliou M, Sanders DS. Is gluten sensitivity a 'no man's land' or a 'fertile crescent' for research? Am J Gastroenterol 2010;105:222-3.<br>27 Wahnschaffe U, Ullrich R, Riecken EO, Schulzke JD. Celiac disease like abnormalities in a sub-group of patients with irritable bowel syndrome. Gastroenterology 2001;121:1329-38<br>28 Wahnschaffe U, Schulzke JD, Zeitz M, Ullrich R. Predictors of clinical response in patients diagnosed with diarrhea-dominant irritable bowel syndrome. Clin Gastroenterol Hepatol 2007;5:844-50<br><br>also refs historically by Troncone and Ferguson |
| 06/07/2011 | <a href="#">5197740</a> | the only problem is under which category to include those patients with Marsh 0 biopsies ie no enteropathy but autoimmune disease with the correct serology                                                                                                                                                                                                                                                                                                                                                                                                                                                                                                                                                     |
| 06/07/2011 | <a href="#">5198378</a> | Not agree.                                                                                                                                                                                                                                                                                                                                                                                                                                                                                                                                                                                                                                                                                                      |
| 06/19/2011 | <a href="#">5244454</a> | Agree                                                                                                                                                                                                                                                                                                                                                                                                                                                                                                                                                                                                                                                                                                           |

**12b. GLUTEN SENSITIVITY: If you disagree with abandoning "gluten sensitivity", please a) argue why this term should be used; b) and list the references that support your stance, and if possible add their PMID-number.**

|            |                         |  |
|------------|-------------------------|--|
| 06/01/2011 | <a href="#">5184241</a> |  |
| 06/01/2011 | <a href="#">5184342</a> |  |
| 06/02/2011 | <a href="#">5187394</a> |  |



|            |                         |                                                                                                                                                                                                                                                                                                                                                                                                                                                                    |
|------------|-------------------------|--------------------------------------------------------------------------------------------------------------------------------------------------------------------------------------------------------------------------------------------------------------------------------------------------------------------------------------------------------------------------------------------------------------------------------------------------------------------|
| 06/02/2011 | <a href="#">5187902</a> | I actually think we might want to swich this to non-celiac gluten intolerance and the current gluten intolerance definition to just gluten sensitivity. this is how it was used in the recent paper: Gluten Causes Gastrointestinal Symptoms in Subjects Without Celiac Disease: A Double-Blind Randomized Placebo-Controlled Trial<br>Jessica R. Biesiekierski , et al. Am J Gastroenterol advance online publication, 11 January 2011; doi: 10.1038/ajg.2010.487 |
| 06/02/2011 | <a href="#">5188116</a> |                                                                                                                                                                                                                                                                                                                                                                                                                                                                    |
| 06/03/2011 | <a href="#">5190026</a> | Both "gluten sensitivity" and "non coeliac gluten sensitivity" should be completaly abandoned. Nobody eats gluten, we eat pizza, bread, pasta, etc etc. So, it cannot be proven that gluten is the noxiuos agent involved in the so called "gluten sensitivity". Could not it be another protein, or carbohydrate?                                                                                                                                                 |
| 06/03/2011 | <a href="#">5191909</a> |                                                                                                                                                                                                                                                                                                                                                                                                                                                                    |
| 06/04/2011 | <a href="#">5192888</a> |                                                                                                                                                                                                                                                                                                                                                                                                                                                                    |
| 06/06/2011 | <a href="#">5194764</a> |                                                                                                                                                                                                                                                                                                                                                                                                                                                                    |
| 06/06/2011 | <a href="#">5196265</a> |                                                                                                                                                                                                                                                                                                                                                                                                                                                                    |
| 06/06/2011 | <a href="#">5196255</a> |                                                                                                                                                                                                                                                                                                                                                                                                                                                                    |
| 06/06/2011 | <a href="#">5196667</a> |                                                                                                                                                                                                                                                                                                                                                                                                                                                                    |
| 06/07/2011 | <a href="#">5197653</a> | see 12a                                                                                                                                                                                                                                                                                                                                                                                                                                                            |
| 06/07/2011 | <a href="#">5197740</a> |                                                                                                                                                                                                                                                                                                                                                                                                                                                                    |
| 06/07/2011 | <a href="#">5198378</a> | Gluten sensitivity is a good term for the clinical setting. It should be used in the litterature after a short definition and statement that it is synonymous with non-celiac gluten intolerance.                                                                                                                                                                                                                                                                  |
| 06/19/2011 | <a href="#">5244454</a> |                                                                                                                                                                                                                                                                                                                                                                                                                                                                    |

**13a. GENETICALLY AT RISK OF CELIAC DISEASE. "Family members of CD patients that test positive for HLA DQ2 and/or DQ8.". AGREE/NOT AGREE? Please motivate (explanatory motives/texts are welcome!).**

|            |                         |                                                                         |
|------------|-------------------------|-------------------------------------------------------------------------|
| 06/01/2011 | <a href="#">5184241</a> | disagree                                                                |
| 06/01/2011 | <a href="#">5184342</a> | I agree                                                                 |
| 06/02/2011 | <a href="#">5187394</a> | agree                                                                   |
| 06/02/2011 | <a href="#">5187902</a> | agree                                                                   |
| 06/02/2011 | <a href="#">5188116</a> | Disagree - a positive family history is not necessary for CD to develop |
| 06/03/2011 | <a href="#">5190026</a> | Do not agree                                                            |
| 06/03/2011 | <a href="#">5191909</a> |                                                                         |
| 06/04/2011 | <a href="#">5192888</a> | agree                                                                   |
| 06/06/2011 | <a href="#">5194764</a> | Partly agreee; it does not havy to be family member.                    |
| 06/06/2011 | <a href="#">5196265</a> |                                                                         |
| 06/06/2011 | <a href="#">5196255</a> | agree                                                                   |
| 06/06/2011 | <a href="#">5196667</a> | disagree                                                                |
| 06/07/2011 | <a href="#">5197653</a> | agree                                                                   |
| 06/07/2011 | <a href="#">5197740</a> | agree                                                                   |
| 06/07/2011 | <a href="#">5198378</a> | Not agree.                                                              |
| 06/19/2011 | <a href="#">5244454</a> | Agree                                                                   |

**13b. GENETICALLY AT RISK OF CELIAC DISEASE. If you disagree with the definition above, please a) suggest an alternative definition; b) list the references**

that support your stance, and if possible add their PMID-number.

|            |                         |                                                                                                                                                                                                                                                                                                                                                                                                                                                                                                                                                                                                                                                             |
|------------|-------------------------|-------------------------------------------------------------------------------------------------------------------------------------------------------------------------------------------------------------------------------------------------------------------------------------------------------------------------------------------------------------------------------------------------------------------------------------------------------------------------------------------------------------------------------------------------------------------------------------------------------------------------------------------------------------|
| 06/01/2011 | <a href="#">5184241</a> | need not be a family member                                                                                                                                                                                                                                                                                                                                                                                                                                                                                                                                                                                                                                 |
| 06/01/2011 | <a href="#">5184342</a> |                                                                                                                                                                                                                                                                                                                                                                                                                                                                                                                                                                                                                                                             |
| 06/02/2011 | <a href="#">5187394</a> |                                                                                                                                                                                                                                                                                                                                                                                                                                                                                                                                                                                                                                                             |
| 06/02/2011 | <a href="#">5187902</a> |                                                                                                                                                                                                                                                                                                                                                                                                                                                                                                                                                                                                                                                             |
| 06/02/2011 | <a href="#">5188116</a> | Individuals that carry HLA DQ2 or DQ8                                                                                                                                                                                                                                                                                                                                                                                                                                                                                                                                                                                                                       |
| 06/03/2011 | <a href="#">5190026</a> | In my opinion this term should not be used. It does not mean anything and it is vague. What about IDDM patients? They too are likely to be "genetically at risk of CD".                                                                                                                                                                                                                                                                                                                                                                                                                                                                                     |
| 06/03/2011 | <a href="#">5191909</a> |                                                                                                                                                                                                                                                                                                                                                                                                                                                                                                                                                                                                                                                             |
| 06/04/2011 | <a href="#">5192888</a> |                                                                                                                                                                                                                                                                                                                                                                                                                                                                                                                                                                                                                                                             |
| 06/06/2011 | <a href="#">5194764</a> |                                                                                                                                                                                                                                                                                                                                                                                                                                                                                                                                                                                                                                                             |
| 06/06/2011 | <a href="#">5196265</a> | All population that test positive for HLA DQ2 and/or DQ8                                                                                                                                                                                                                                                                                                                                                                                                                                                                                                                                                                                                    |
| 06/06/2011 | <a href="#">5196255</a> |                                                                                                                                                                                                                                                                                                                                                                                                                                                                                                                                                                                                                                                             |
| 06/06/2011 | <a href="#">5196667</a> | Anyone carrying HLA dq2 or dq8 not just family members It could be people with some changes in the gut not enough to call celiac disease<br><br>HLA DQ gene dosage and risk and severity of celiac disease.<br><br>Murray, JA. Moore, SB. Van Dyke, CT. Lahr, BD. Dierkhising, RA. Zinsmeister, AR. Melton, LJ 3rd. Kroning, CM. El-Yousseff, M. Czaja, AJ.<br><br>Clinical Gastroenterology & Hepatology. 2007 Dec; 5(12): 1406-12<br>Vande Voort, JL. Murray, JA. Lahr, BD. Van Dyke, CT. Kroning, CM. Moore, SB. Wu, TT.<br><br>Lymphocytic duodenosis and the spectrum of celiac disease. American Journal of Gastroenterology. 2009 Jan; 104(1): 142-8 |
| 06/07/2011 | <a href="#">5197653</a> |                                                                                                                                                                                                                                                                                                                                                                                                                                                                                                                                                                                                                                                             |
| 06/07/2011 | <a href="#">5197740</a> |                                                                                                                                                                                                                                                                                                                                                                                                                                                                                                                                                                                                                                                             |
| 06/07/2011 | <a href="#">5198378</a> | There will be many other individuals in the society that also are at risk. Genetic profiling will tell us much more about this and provide a more stringent definition of at-risk individuals.                                                                                                                                                                                                                                                                                                                                                                                                                                                              |
| 06/19/2011 | <a href="#">5244454</a> |                                                                                                                                                                                                                                                                                                                                                                                                                                                                                                                                                                                                                                                             |

**14a. CELIAC DISEASE: "Inflammation within the proximal small intestine that is precipitated by exposure to gluten and that is not an allergy or eosinophilic gastroenteritis. It is typified by pathologic changes that incorporate an adaptive T cell-mediated response to gluten and intraepithelial lymphocytosis. Positive celiac disease serology (tissue transglutaminase and endomysium antibodies) supports the diagnosis celiac disease." . AGREE/NOT AGREE? Please motivate (explanatory motives/texts are welcome!).**

|            |                         |                                                      |
|------------|-------------------------|------------------------------------------------------|
| 06/01/2011 | <a href="#">5184241</a> | agree                                                |
| 06/01/2011 | <a href="#">5184342</a> | I partially agree with the definition                |
| 06/02/2011 | <a href="#">5187394</a> | agree                                                |
| 06/02/2011 | <a href="#">5187902</a> | Agree, but should there also be mention of HLA type? |

|            |                         |                                                                                                                                                                                                                                                                                                                                                                                |
|------------|-------------------------|--------------------------------------------------------------------------------------------------------------------------------------------------------------------------------------------------------------------------------------------------------------------------------------------------------------------------------------------------------------------------------|
| 06/02/2011 | <a href="#">5188116</a> | Agree except that I would change "Inflammation within the proximal small intestine" to "small intestinal inflammation"                                                                                                                                                                                                                                                         |
| 06/03/2011 | <a href="#">5190026</a> | Agree                                                                                                                                                                                                                                                                                                                                                                          |
| 06/03/2011 | <a href="#">5191909</a> |                                                                                                                                                                                                                                                                                                                                                                                |
| 06/04/2011 | <a href="#">5192888</a> | disagree                                                                                                                                                                                                                                                                                                                                                                       |
| 06/06/2011 | <a href="#">5194764</a> | not agree. CD is an autoimmune-mediated enteropathy triggered largely by the ingestion of a single dietary factor – wheat, rye and barley derived gluten in genetically susceptible persons; both T-cell mediated and humoral as well as innate immune responses are involved.                                                                                                 |
| 06/06/2011 | <a href="#">5196265</a> | I agree                                                                                                                                                                                                                                                                                                                                                                        |
| 06/06/2011 | <a href="#">5196255</a> | state increased IELs /100 enterocytes to be <25<br>Gastroenterology. 2010 Jul;139(1):112-9. Epub 2010 Apr 13.<br><br>Detection of celiac disease and lymphocytic enteropathy by parallel serology and histopathology in a population-based study.<br><br>Walker MM, Murray JA, Ronkainen J, Aro P, Storskrubb T, D'Amato M, Lahr B, Talley NJ, Agreus L.<br><br>PMID: 20398668 |
| 06/06/2011 | <a href="#">5196667</a> | agree                                                                                                                                                                                                                                                                                                                                                                          |
| 06/07/2011 | <a href="#">5197653</a> | agree                                                                                                                                                                                                                                                                                                                                                                          |
| 06/07/2011 | <a href="#">5197740</a> | agree                                                                                                                                                                                                                                                                                                                                                                          |
| 06/07/2011 | <a href="#">5198378</a> | Agree. To me the enteropathy is still and should in the future be crucial for the definition.                                                                                                                                                                                                                                                                                  |
| 06/19/2011 | <a href="#">5244454</a> | Agree                                                                                                                                                                                                                                                                                                                                                                          |

**14b. CELIAC DISEASE: If you disagree with the definition above, please a) suggest an alternative definition; b) list the references that support your stance, and if possible add their PMID-number.**

|            |                         |                                                                                                                                                                                                                                                                                                                                                                                                                                                                                          |
|------------|-------------------------|------------------------------------------------------------------------------------------------------------------------------------------------------------------------------------------------------------------------------------------------------------------------------------------------------------------------------------------------------------------------------------------------------------------------------------------------------------------------------------------|
| 06/01/2011 | <a href="#">5184241</a> |                                                                                                                                                                                                                                                                                                                                                                                                                                                                                          |
| 06/01/2011 | <a href="#">5184342</a> | Positive celiac disease serology should include antibodies to deamidated gliadin peptides (a-DGP). Celiac disease serology in patients with different pretest probabilities: is biopsy avoidable?<br><br>Among other studies:<br>Sugai E, Moreno ML, Hwang HJ, Cabanne A, Crivelli A, Nachman F, Vázquez H, Niveloni S, Argonz J, Mazure R, La Motta G, Caniggia ME, Smecuol E, Chopita N, Gómez JC, Mauriño E, Bai JC. World J Gastroenterol. 2010 Jul 7;16(25):3144-52. PMID: 20593499 |
| 06/02/2011 | <a href="#">5187394</a> |                                                                                                                                                                                                                                                                                                                                                                                                                                                                                          |
| 06/02/2011 | <a href="#">5187902</a> |                                                                                                                                                                                                                                                                                                                                                                                                                                                                                          |
| 06/02/2011 | <a href="#">5188116</a> | "Small intestinal inflammation that is precipitated by exposure to gluten and that is not an allergy or eosinophilic gastroenteritis. It is typified by pathologic changes that incorporate an adaptive T cell-mediated response to gluten and intraepithelial lymphocytosis. Positive celiac disease serology (tissue transglutaminase and endomysium antibodies) supports the diagnosis celiac disease."                                                                               |
| 06/03/2011 | <a href="#">5190026</a> |                                                                                                                                                                                                                                                                                                                                                                                                                                                                                          |
| 06/03/2011 | <a href="#">5191909</a> |                                                                                                                                                                                                                                                                                                                                                                                                                                                                                          |
| 06/04/2011 | <a href="#">5192888</a> | Please explain why we should not define celiac disease as an autoimmune reaction to gluten                                                                                                                                                                                                                                                                                                                                                                                               |
| 06/06/2011 | <a href="#">5194764</a> | see above 14a                                                                                                                                                                                                                                                                                                                                                                                                                                                                            |
| 06/06/2011 | <a href="#">5196265</a> |                                                                                                                                                                                                                                                                                                                                                                                                                                                                                          |
| 06/06/2011 | <a href="#">5196255</a> |                                                                                                                                                                                                                                                                                                                                                                                                                                                                                          |
| 06/06/2011 | <a href="#">5196667</a> |                                                                                                                                                                                                                                                                                                                                                                                                                                                                                          |
| 06/07/2011 | <a href="#">5197653</a> |                                                                                                                                                                                                                                                                                                                                                                                                                                                                                          |
| 06/07/2011 | <a href="#">5197740</a> |                                                                                                                                                                                                                                                                                                                                                                                                                                                                                          |
| 06/07/2011 | <a href="#">5198378</a> |                                                                                                                                                                                                                                                                                                                                                                                                                                                                                          |

06/19/2011 [5244454](#)

15a. GLUTEN INTOLERANCE: *"all known or suspected consequences of gluten. This would include celiac disease, dermatitis herpetiformis, and give mention to the possibility that further disorders are not proven, such as gluten ataxia, gluten-sensitive neuropathy, and nonspecific symptoms including diarrhea, that might result from gluten ingestion but have not been proven to do so. Gluten intolerance is not a synonym of "celiac disease".*" AGREE/NOT AGREE? Please motivate (explanatory motives/texts are welcome!).

|            |                         |                                                                                                                                                                                                                        |
|------------|-------------------------|------------------------------------------------------------------------------------------------------------------------------------------------------------------------------------------------------------------------|
| 06/01/2011 | <a href="#">5184241</a> | agree                                                                                                                                                                                                                  |
| 06/01/2011 | <a href="#">5184342</a> | Not agree                                                                                                                                                                                                              |
| 06/02/2011 | <a href="#">5187394</a> | should gluten intolerance exclude non-celiac GS?                                                                                                                                                                       |
| 06/02/2011 | <a href="#">5187902</a> | See 12b above. would advocate this being gluten sensitivity and non-celiac gluten intolerance for 12.                                                                                                                  |
| 06/02/2011 | <a href="#">5188116</a> | Disagree. This needs clarification or it will perpetuate the current confusion. Does the term include wheat gluten allergy? Does it include or exclude non-celiac gluten sensitivity or non-celiac gluten intolerance. |
| 06/03/2011 | <a href="#">5190026</a> | I agree (I wrote it..) Anyway, I am really not sure that we need a term to indicate all known or suspected consequences of gluten. We could abandon it.                                                                |
| 06/03/2011 | <a href="#">5191909</a> |                                                                                                                                                                                                                        |
| 06/04/2011 | <a href="#">5192888</a> | agree                                                                                                                                                                                                                  |
| 06/06/2011 | <a href="#">5194764</a> | not a synonyme to CD that I agree.                                                                                                                                                                                     |
| 06/06/2011 | <a href="#">5196265</a> | I agree                                                                                                                                                                                                                |
| 06/06/2011 | <a href="#">5196255</a> | agree                                                                                                                                                                                                                  |
| 06/06/2011 | <a href="#">5196667</a> | agree                                                                                                                                                                                                                  |
| 06/07/2011 | <a href="#">5197653</a> | agree - hate the word confusing like saying lactose intolerant more like a lay term                                                                                                                                    |
| 06/07/2011 | <a href="#">5197740</a> | agree                                                                                                                                                                                                                  |
| 06/07/2011 | <a href="#">5198378</a> | Agree. But I feel we should decide on either gluten sensitivity or gluten intolerance. I prefer gluten sensitivity.                                                                                                    |
| 06/19/2011 | <a href="#">5244454</a> | Agree                                                                                                                                                                                                                  |

15b. GLUTEN INTOLERANCE: If you disagree with the definition above, please a) suggest an alternative definition; b) list the references that support your stance, and if possible add their PMID-number.

|            |                         |                                                                                                                                                                                                                                                                                                                                                                                                                 |
|------------|-------------------------|-----------------------------------------------------------------------------------------------------------------------------------------------------------------------------------------------------------------------------------------------------------------------------------------------------------------------------------------------------------------------------------------------------------------|
| 06/01/2011 | <a href="#">5184241</a> | would include wheat / allergy                                                                                                                                                                                                                                                                                                                                                                                   |
| 06/01/2011 | <a href="#">5184342</a> | I think that modern definition replacing to "gluten intolerance" is GLUTEN RELATED DISORDERS which includes "non celiac disease gluten sensitivity" "celiac disease" and "wheat allergy". Intolerance as referred before is a clinical definition making confusion with the immunological sence of the word intolerance. Furthermore, DH and gluten ataxia should be considered in the group of celiac disease. |
| 06/02/2011 | <a href="#">5187394</a> |                                                                                                                                                                                                                                                                                                                                                                                                                 |
| 06/02/2011 | <a href="#">5187902</a> |                                                                                                                                                                                                                                                                                                                                                                                                                 |

|            |                         |  |
|------------|-------------------------|--|
| 06/02/2011 | <a href="#">5188116</a> |  |
| 06/03/2011 | <a href="#">5190026</a> |  |
| 06/03/2011 | <a href="#">5191909</a> |  |
| 06/04/2011 | <a href="#">5192888</a> |  |
| 06/06/2011 | <a href="#">5194764</a> |  |
| 06/06/2011 | <a href="#">5196265</a> |  |
| 06/06/2011 | <a href="#">5196255</a> |  |
| 06/06/2011 | <a href="#">5196667</a> |  |
| 06/07/2011 | <a href="#">5197653</a> |  |
| 06/07/2011 | <a href="#">5197740</a> |  |
| 06/07/2011 | <a href="#">5198378</a> |  |
| 06/19/2011 | <a href="#">5244454</a> |  |

**16a. GLUTEN-SPECIFIC ANTIBODIES.** No definitions has yet been suggested for this term. I urge everyone to suggest a definition.

|            |                         |                                                                                                                                                                                                                                                    |
|------------|-------------------------|----------------------------------------------------------------------------------------------------------------------------------------------------------------------------------------------------------------------------------------------------|
| 06/01/2011 | <a href="#">5184241</a> | antigliadin and anti gliadin peptide antibodies                                                                                                                                                                                                    |
| 06/01/2011 | <a href="#">5184342</a> | these antibodies are conventional AGAs and modern DGPs. Different to tTG and EmA. I prefer the more general celiac disease-specific antibodies.                                                                                                    |
| 06/02/2011 | <a href="#">5187394</a> |                                                                                                                                                                                                                                                    |
| 06/02/2011 | <a href="#">5187902</a> | Should this be celiac specific and celiac related antibodies rather than gluten?                                                                                                                                                                   |
| 06/02/2011 | <a href="#">5188116</a> | Antibodies that recognize epitopes specific to gluten proteins                                                                                                                                                                                     |
| 06/03/2011 | <a href="#">5190026</a> | I would recomand to abandon this and similar terms (coeliac antibodies). They are handy but they do not show their totally different diagnostic accuracy. So, I would raccomend to use the name of the antibody (antigliadin, endomysial, etc etc) |
| 06/03/2011 | <a href="#">5191909</a> |                                                                                                                                                                                                                                                    |
| 06/04/2011 | <a href="#">5192888</a> | If you refer to TTG and EMA, I would define them as gluten-induced autoantibodies                                                                                                                                                                  |
| 06/06/2011 | <a href="#">5194764</a> | why not celiac-specific antibodies; antibodies aganst autoantigen transglutaminase 2.                                                                                                                                                              |
| 06/06/2011 | <a href="#">5196265</a> |                                                                                                                                                                                                                                                    |
| 06/06/2011 | <a href="#">5196255</a> |                                                                                                                                                                                                                                                    |
| 06/06/2011 | <a href="#">5196667</a> | disagree drop                                                                                                                                                                                                                                      |
| 06/07/2011 | <a href="#">5197653</a> | antibodies in response to the ingestion of gluten including TTG, EMA and gliadins                                                                                                                                                                  |
| 06/07/2011 | <a href="#">5197740</a> |                                                                                                                                                                                                                                                    |
| 06/07/2011 | <a href="#">5198378</a> | Also this term is of minor use. The anti-DGP antibodies should be appropriately defined.                                                                                                                                                           |
| 06/19/2011 | <a href="#">5244454</a> |                                                                                                                                                                                                                                                    |

**16a. GLUTEN-RELATED ANTIBODIES.** No definitions has yet been suggested for this term. I urge everyone to suggest a definition.

|            |                         |                                                  |
|------------|-------------------------|--------------------------------------------------|
| 06/01/2011 | <a href="#">5184241</a> | EMA, tTG IgA                                     |
| 06/01/2011 | <a href="#">5184342</a> |                                                  |
| 06/02/2011 | <a href="#">5187394</a> |                                                  |
| 06/02/2011 | <a href="#">5187902</a> |                                                  |
| 06/02/2011 | <a href="#">5188116</a> | The term is vague and should be dropped          |
| 06/03/2011 | <a href="#">5190026</a> |                                                  |
| 06/03/2011 | <a href="#">5191909</a> |                                                  |
| 06/04/2011 | <a href="#">5192888</a> | If you refer to AGA, I would define them as such |
| 06/06/2011 | <a href="#">5194764</a> | very vague word could be anything.               |

|            |                         |                                                                   |
|------------|-------------------------|-------------------------------------------------------------------|
| 06/06/2011 | <a href="#">5196265</a> |                                                                   |
| 06/06/2011 | <a href="#">5196255</a> |                                                                   |
| 06/06/2011 | <a href="#">5196667</a> | drop also replace with celiac related antibodies ( glaidins etc ) |
| 06/07/2011 | <a href="#">5197653</a> | am easy could use the same as 16a                                 |
| 06/07/2011 | <a href="#">5197740</a> |                                                                   |
| 06/07/2011 | <a href="#">5198378</a> | A definition is not really needed. The term is very rarely used.  |
| 06/19/2011 | <a href="#">5244454</a> |                                                                   |

**17a. LATENT CELIAC DISEASE: "*Individual with positive celiac disease serology with a normal duodenal or jejunal biopsy*". AGREE/NOT AGREE? Please motivate (explanatory motives/texts are welcome!).**

|            |                         |                                                                                                                                                                                                                                                                                                                                                                                                                                                                     |
|------------|-------------------------|---------------------------------------------------------------------------------------------------------------------------------------------------------------------------------------------------------------------------------------------------------------------------------------------------------------------------------------------------------------------------------------------------------------------------------------------------------------------|
| 06/01/2011 | <a href="#">5184241</a> | agree                                                                                                                                                                                                                                                                                                                                                                                                                                                               |
| 06/01/2011 | <a href="#">5184342</a> | I partially agree with the definition                                                                                                                                                                                                                                                                                                                                                                                                                               |
| 06/02/2011 | <a href="#">5187394</a> | agree                                                                                                                                                                                                                                                                                                                                                                                                                                                               |
| 06/02/2011 | <a href="#">5187902</a> | mostly agree but this should be limited to EMA, DGP or tTG. eg. NOT AGA only.                                                                                                                                                                                                                                                                                                                                                                                       |
| 06/02/2011 | <a href="#">5188116</a> | Agree except that I would better define positive serology                                                                                                                                                                                                                                                                                                                                                                                                           |
| 06/03/2011 | <a href="#">5190026</a> | According to Ann Ferguson (Gut 1993 Feb;34:150-1 PMID: 8432463), this is potential CD. After you showed that a patient with potential CD has flattened, you can write that he/she WAS latent.                                                                                                                                                                                                                                                                       |
| 06/03/2011 | <a href="#">5191909</a> |                                                                                                                                                                                                                                                                                                                                                                                                                                                                     |
| 06/04/2011 | <a href="#">5192888</a> | disagree                                                                                                                                                                                                                                                                                                                                                                                                                                                            |
| 06/06/2011 | <a href="#">5194764</a> | not agree; somebody has ahd to develop later villosua trophy and celiac disease; and retrospectively you know that the person had earlier latent CD. Also those cases how have had CD as childhood and remain in remission long (PMID: 17303598 )Ann Ferguson had definitions for this long ago:linical and pathological spectrum of coeliac disease-- active, silent, latent, potential.<br><br>Ferguson A, Arranz E, O'Mahony S.<br><br>Gut. 1993 Feb;34(2):150-1 |
| 06/06/2011 | <a href="#">5196265</a> | I agree                                                                                                                                                                                                                                                                                                                                                                                                                                                             |
| 06/06/2011 | <a href="#">5196255</a> | Should this not include +ve HLA typing also?<br>J Pediatr Gastroenterol Nutr. 2011 Jun;52(6):729-733.<br><br>HLA-DQ Genotyping Combined With Serological Markers for the Diagnosis of Celiac Disease: Is Intestinal Biopsy Still Mandatory?<br><br>Clouzeau-Girard H, Rebouissoux L, Taupin JL, Le Bail B, Kalach N, Michaud L, Dabadie A, Olives JP, Blanco P, Morali A, Moreau JF, Lamireau T.<br><br>PMID: 21593645                                              |
| 06/06/2011 | <a href="#">5196667</a> | disagree How about Increased IELS with negative serology? many pateints with celiac disease have negative serology so why not a latent? Vande Voort, JL. Murray, JA. Lahr, BD. Van Dyke, CT. Kroning, CM. Moore, SB. Wu, TT.<br><br>Lymphocytic duodenosis and the spectrum of celiac disease. American Journal of Gastroenterology. 2009 Jan; 104(1): 142-8 PMID 19098862<br><br>also<br>PMID: 18304884                                                            |
| 06/07/2011 | <a href="#">5197653</a> | agree but also it is a transient phenomenon                                                                                                                                                                                                                                                                                                                                                                                                                         |
| 06/07/2011 | <a href="#">5197740</a> | what about those patients with IGA deposits in the gut?                                                                                                                                                                                                                                                                                                                                                                                                             |
| 06/07/2011 | <a href="#">5198378</a> | Agree.                                                                                                                                                                                                                                                                                                                                                                                                                                                              |
| 06/19/2011 | <a href="#">5244454</a> | Agree                                                                                                                                                                                                                                                                                                                                                                                                                                                               |

17b. LATENT CELIAC DISEASE: If you disagree with the definition above, please a) suggest an alternative definition; b) list the references that support your stance, and if possible add their PMID-number.

|            |                         |                                                                                                                   |
|------------|-------------------------|-------------------------------------------------------------------------------------------------------------------|
| 06/01/2011 | <a href="#">5184241</a> |                                                                                                                   |
| 06/01/2011 | <a href="#">5184342</a> | It should include the concept of autoimmune antibodies (tTG and EmA)                                              |
| 06/02/2011 | <a href="#">5187394</a> |                                                                                                                   |
| 06/02/2011 | <a href="#">5187902</a> |                                                                                                                   |
| 06/02/2011 | <a href="#">5188116</a> | "Individual with positive celiac disease serology (EMA, tTG or DGP) but with a normal duodenal or jejunal biopsy" |
| 06/03/2011 | <a href="#">5190026</a> |                                                                                                                   |
| 06/03/2011 | <a href="#">5191909</a> |                                                                                                                   |
| 06/04/2011 | <a href="#">5192888</a> | I would abandon this term and I would suggest to use only potential CD                                            |
| 06/06/2011 | <a href="#">5194764</a> |                                                                                                                   |
| 06/06/2011 | <a href="#">5196265</a> |                                                                                                                   |
| 06/06/2011 | <a href="#">5196255</a> |                                                                                                                   |
| 06/06/2011 | <a href="#">5196667</a> | see 17a                                                                                                           |
| 06/07/2011 | <a href="#">5197653</a> |                                                                                                                   |
| 06/07/2011 | <a href="#">5197740</a> |                                                                                                                   |
| 06/07/2011 | <a href="#">5198378</a> |                                                                                                                   |
| 06/19/2011 | <a href="#">5244454</a> |                                                                                                                   |

## Free comments.

|            |                         |                                                                                                                                                                         |
|------------|-------------------------|-------------------------------------------------------------------------------------------------------------------------------------------------------------------------|
| 06/01/2011 | <a href="#">5184241</a> |                                                                                                                                                                         |
| 06/01/2011 | <a href="#">5184342</a> |                                                                                                                                                                         |
| 06/02/2011 | <a href="#">5187394</a> |                                                                                                                                                                         |
| 06/02/2011 | <a href="#">5187902</a> | will be interested to see the comments, thanks, Dan                                                                                                                     |
| 06/02/2011 | <a href="#">5188116</a> | The definitions should be kept as short and simple as possible. Examples and lists of symptoms etc can be included in the commentary but excluded from the definitions. |
| 06/03/2011 | <a href="#">5190026</a> |                                                                                                                                                                         |
| 06/03/2011 | <a href="#">5191909</a> |                                                                                                                                                                         |
| 06/04/2011 | <a href="#">5192888</a> |                                                                                                                                                                         |
| 06/06/2011 | <a href="#">5194764</a> |                                                                                                                                                                         |
| 06/06/2011 | <a href="#">5196265</a> |                                                                                                                                                                         |
| 06/06/2011 | <a href="#">5196255</a> | Thank you Jonas for a job well done! Marjorie                                                                                                                           |
| 06/06/2011 | <a href="#">5196667</a> |                                                                                                                                                                         |
| 06/07/2011 | <a href="#">5197653</a> |                                                                                                                                                                         |
| 06/07/2011 | <a href="#">5197740</a> | plenty of discussion!                                                                                                                                                   |
| 06/07/2011 | <a href="#">5198378</a> |                                                                                                                                                                         |
| 06/19/2011 | <a href="#">5244454</a> |                                                                                                                                                                         |
